# Supplementary material for: Full-length Transcriptome Reconstruction Reveals Genetic Differences in Hybrids of Oryza Sativa and Oryza Punctata With Different Ploidy and Genome Compositions
Source: Research Square preprint supplement (doi:10.21203/rs.3.rs-882461/v1), 2021-10-01
Supplement: Supplementary file 5 [file 66ec7bfb290c3b3622125f0e.docx]

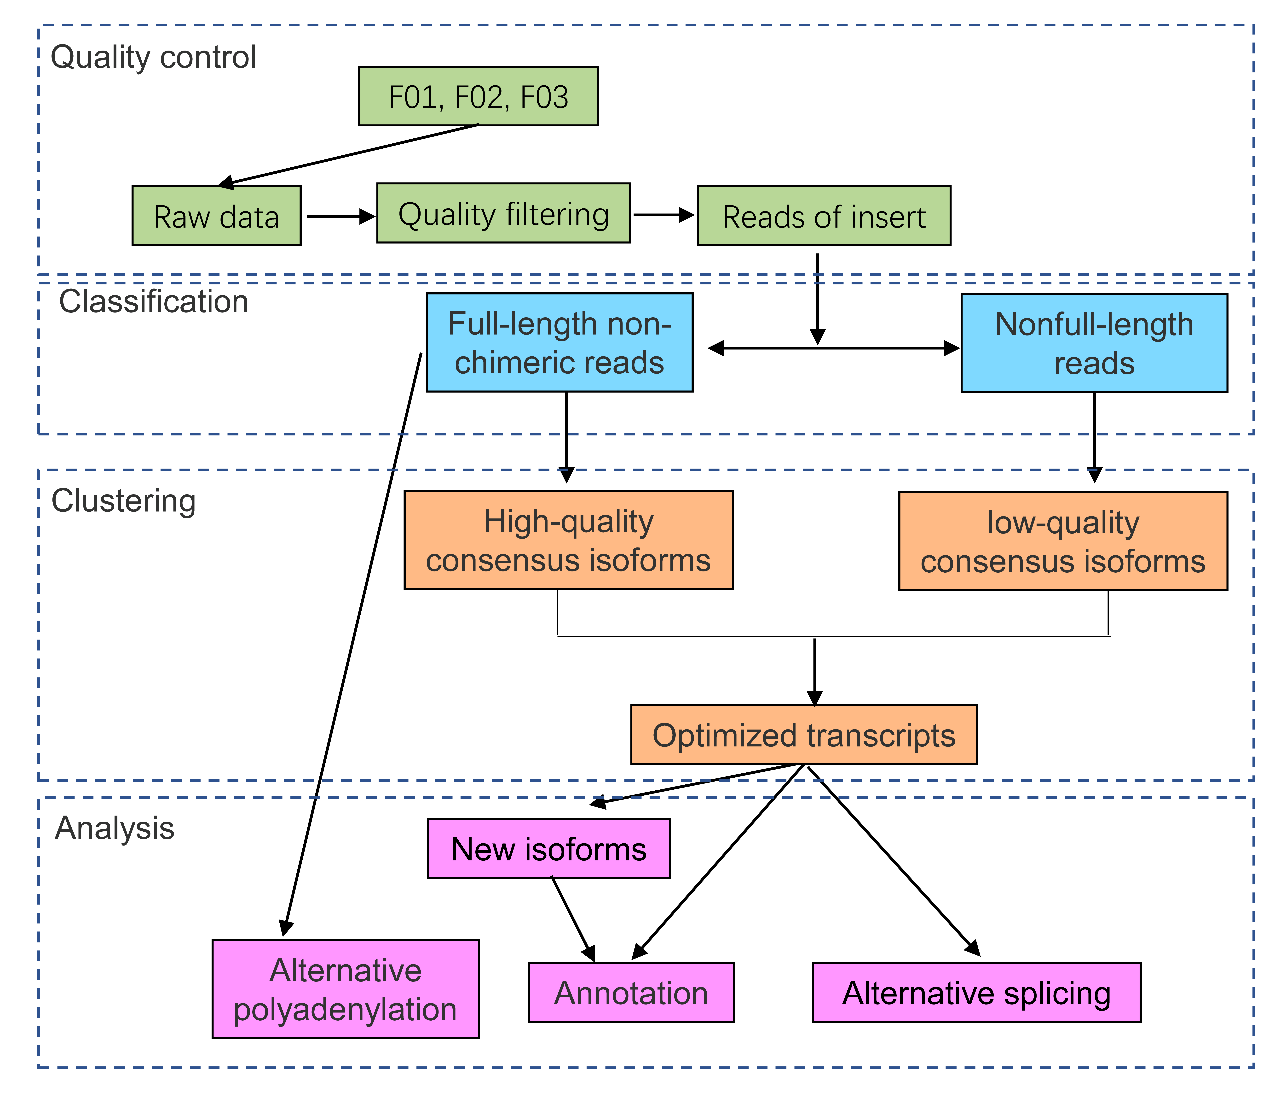


**Fig. S1** Flowchart of the experimental design and analysis for PacBio sequencing and RNA sequencing. This pipeline includes the workflow for the quality control of the raw data, the classification of the reads of the insert, isoform clustering, correction, and transcriptome analysis.


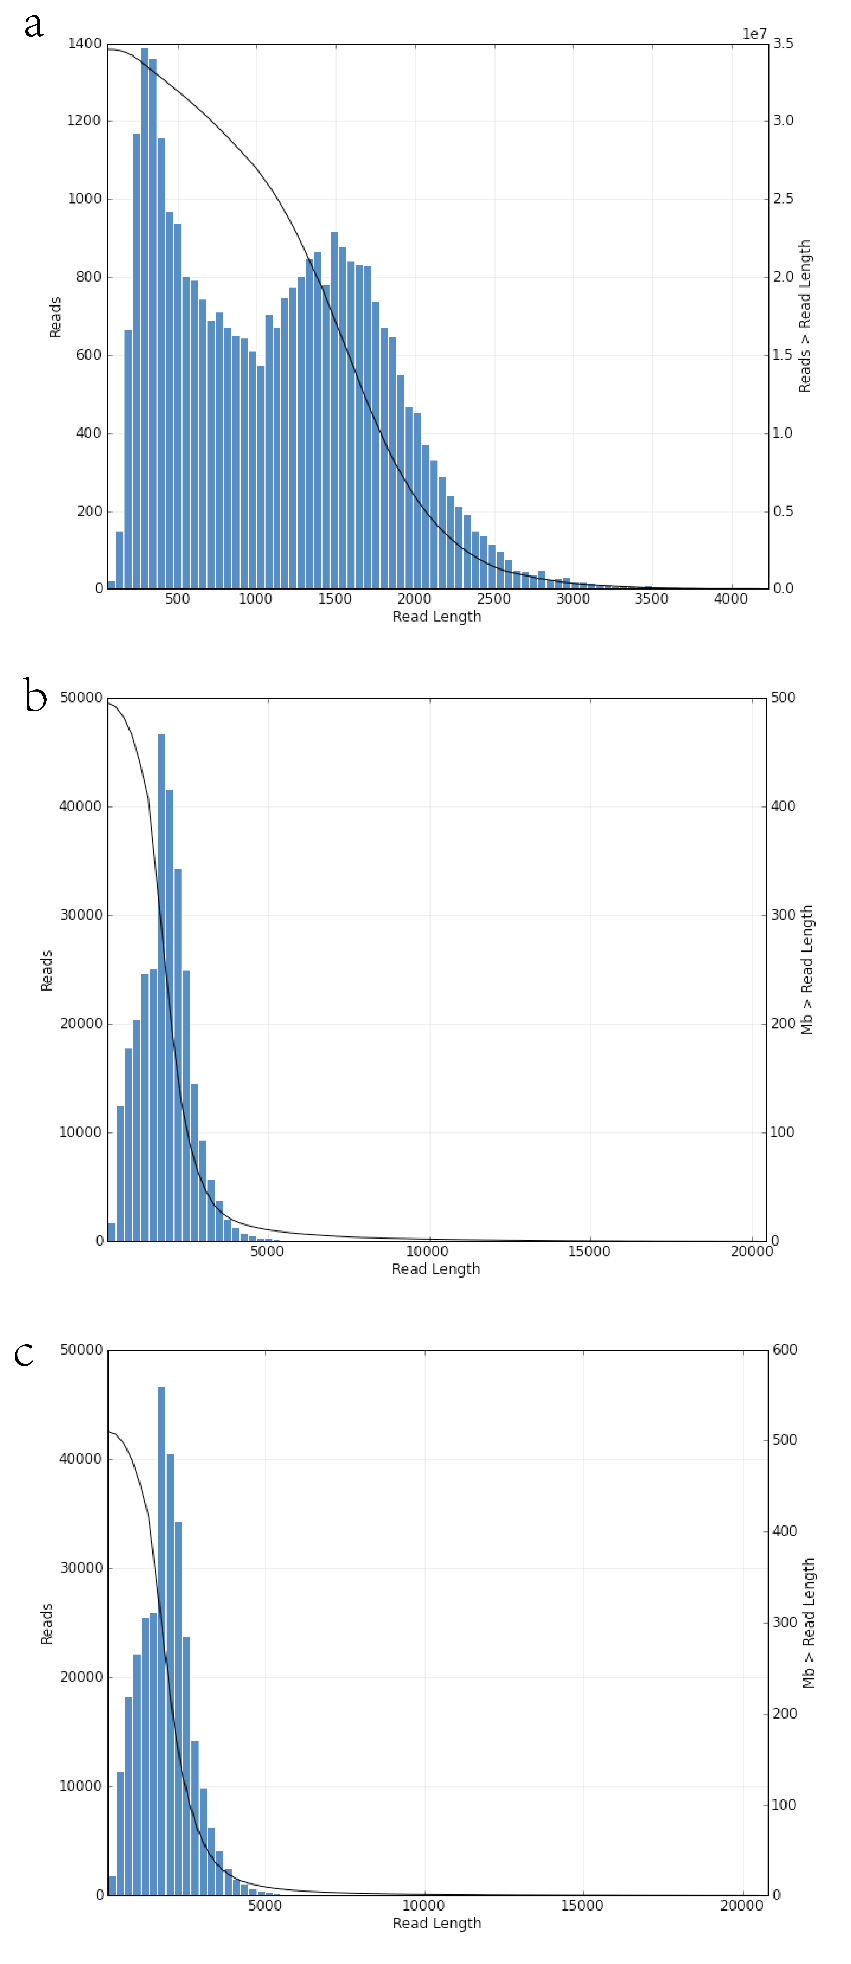


**Fig. S2** Read length with different ploidy hybrids. **a** F01. **b** F02. **c** F03


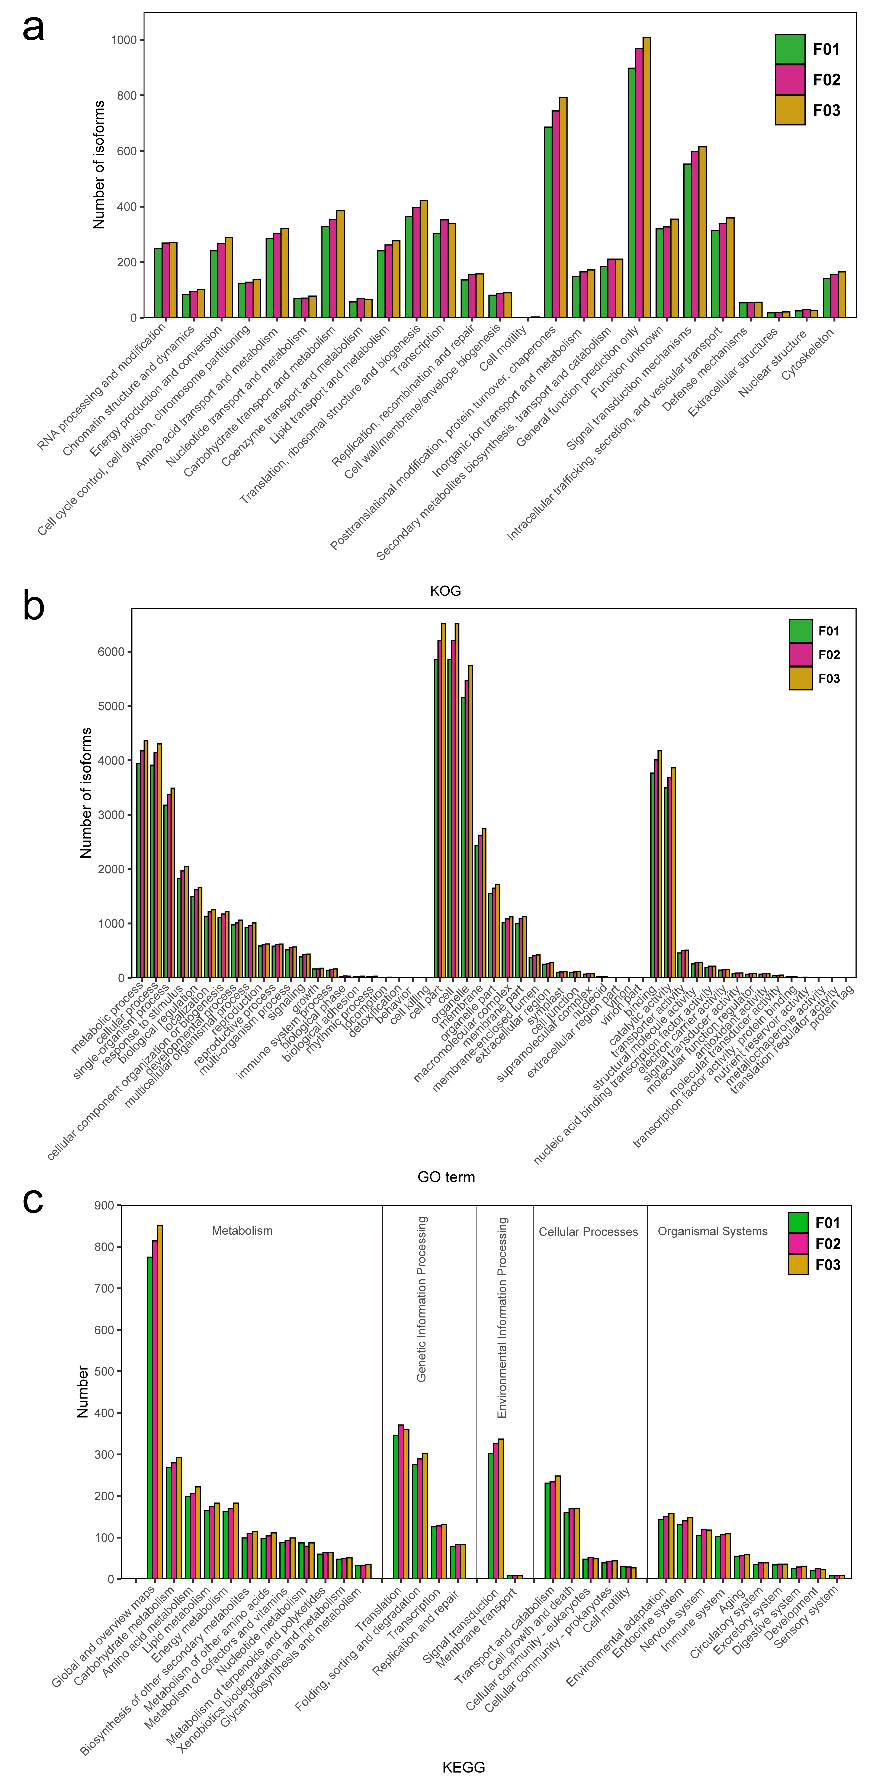


**Fig. S3** The number of isoforms of functional annotation of with different ploidy hybrids. **a** Number of isoforms of KOG enrichment. **b** Number of isoforms of KOG enrichment (GO) term. **c** Number of isoforms of KEGG enrichment (GO) terms
